# Supplementary material for: A basal-like breast cancer-specific role for SRF–IL6 in YAP-induced cancer stemness
Source: PubMed Central journal article supplement (PMC4703869; doi:10.1038/ncomms10186), 2015-12-16
Supplement: ncomms10186-s1.pdf [file ncomms10186-s1.pdf]

## Supplementary Figures

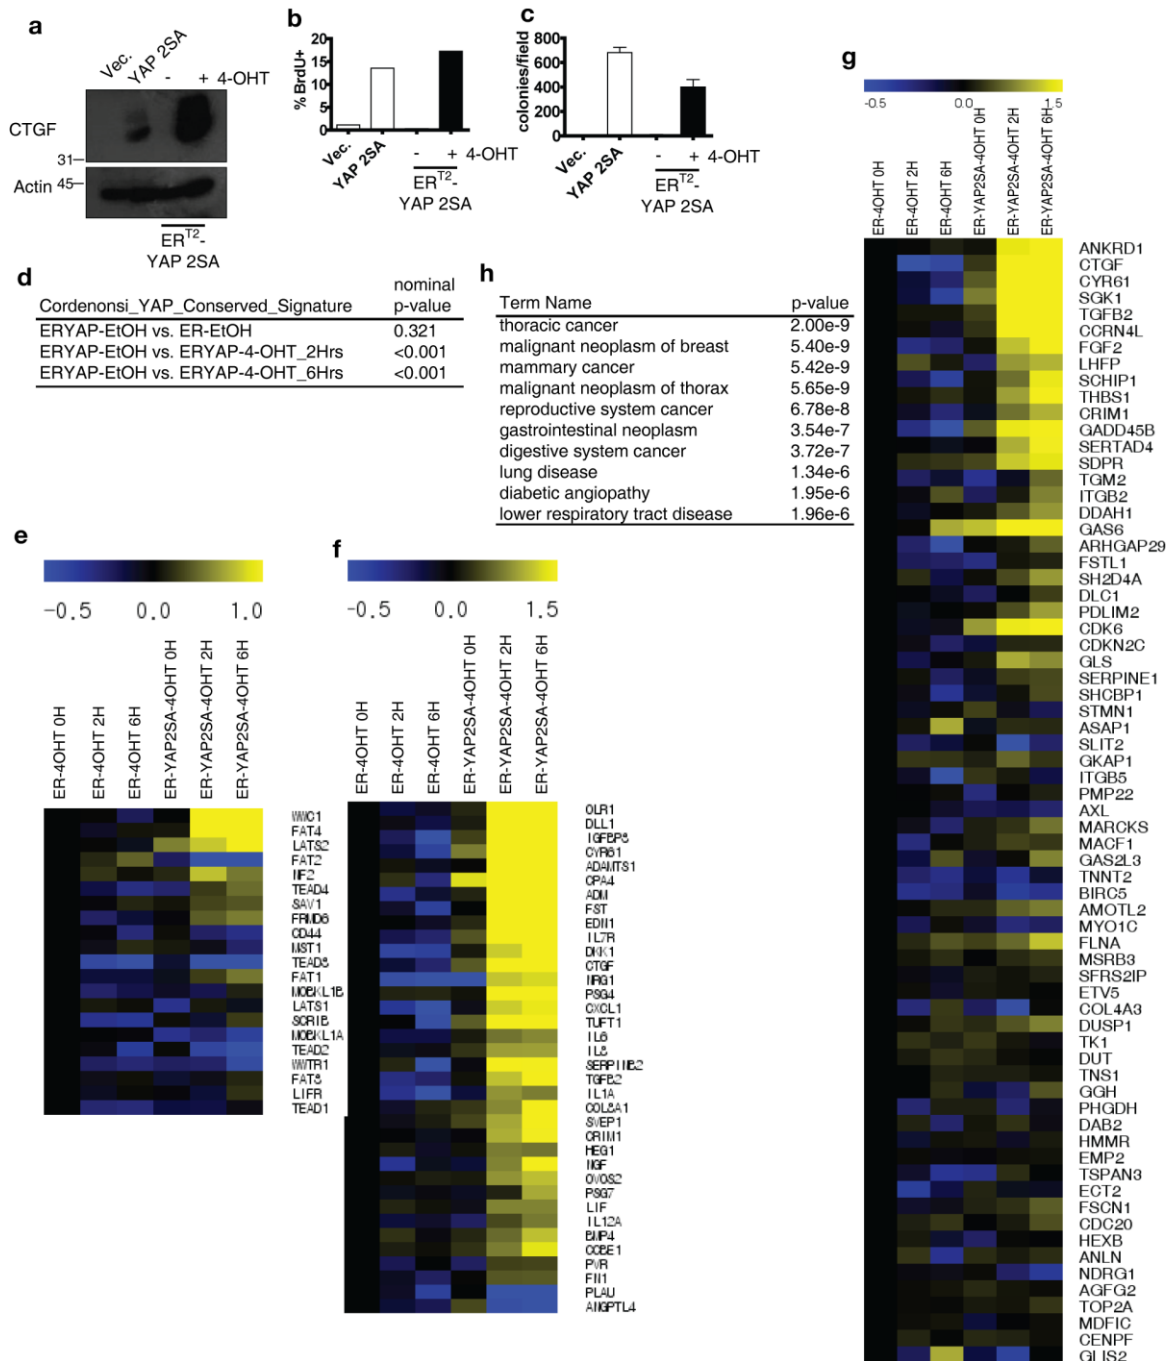

**Supplementary Figure 1. Summary of microarray analysis of MCF-10A ERT2-YAP 2SA cells.** (a-d) Validation of the ER<sup>T2</sup>-YAP 2SA system. MCF-10A cells were infected with the indicated retroviruses. (a) Western blot, (b) BrdU assay after 48-hour serum starvation (n=1 experiment), and (c) soft agar colony counts for cells generated (n=3 experiments). (d) Gene set enrichment analysis summary for conserved YAP target genes. (e) Heatmap analysis of selected Hippo pathway genes. (f) Heatmap analysis of selected secreted genes. (g) Heatmap analysis of YAP/TAZ signature genes listed by Piccolo and colleagues<sup>1</sup>. (h) Gene Ontology

analysis of genes significantly upregulated following YAP induction. Data are presented as means  $\pm$  s.e.m..

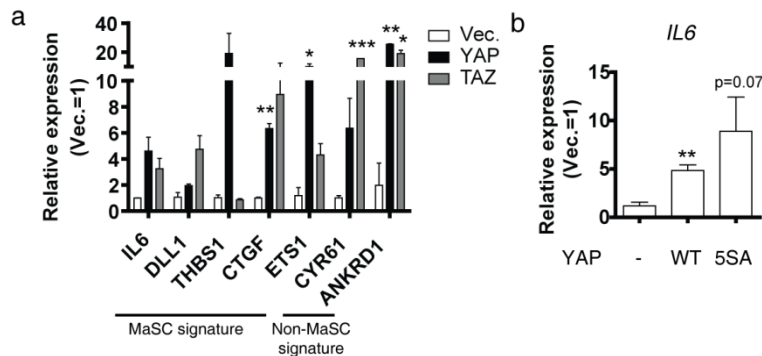

**Supplementary Figure 2. YAP and TAZ are redundant with respect to MaSC signature gene expression.**

(a) qRT-PCR analyses of the expression of the indicated genes in MCF-10A cells overexpressing YAP or TAZ (n=2 replicates). (b) qRT-PCR data for IL6 expression in MCF-10A cells expressing indicated forms of YAP (n=2 experiments with 2 replicates). Data are presented as means  $\pm$  s.e.m. (\*P<0.05, \*\*P<0.01, \*\*\*P<0.001, student's t-test used in all analyses).

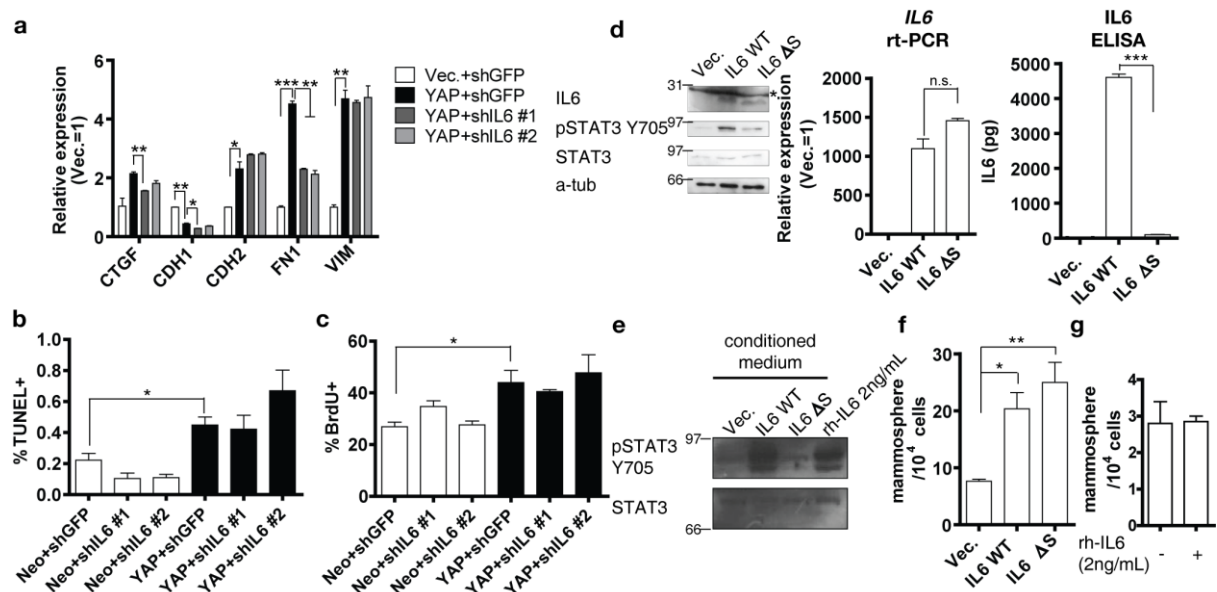

**Supplementary Figure 3. Intracellular IL6 signaling promotes MaSC-like properties.**

(a) qRT-PCR analyses of the expression of the indicated genes in MCF-10A cells infected with the indicated viruses (n=2 replicates). (b) TUNEL assay (n=3 experiments) and (c) BrdU uptake assay (n=3 experiments) for MCF-10A cells infected with the indicated viruses. (d-f) MCF-10A cells were infected with retrovirus overexpressing either wild-type IL6 (IL6 WT) or signaling peptide-deficient IL6 (IL6 ΔS). (d) Western blot, qRT-PCR (n=2 replicates) and ELISA (n=3 replicates) analyses of MCF-10A cells expressing indicated forms of IL6 for

detection of intracellular IL6, *IL6* mRNA and secreted IL6, respectively. Asterisk in western blot indicates a non specific band. (e) Western blot analysis of serum-starved MCF-10A cells treated with recombinant IL6 (rh-IL6) or conditioned medium from the indicated cells. (f) Mammosphere assay of MCF-10A cells expressing the indicated genes (n=3 experiments). (g) Mammosphere assay of MCF-10A cells treated with indicated amount of recombinant human IL6 (rhIL6) (n=3 experiments). Data are presented as means  $\pm$  s.e.m. (\*P<0.05, \*\*P<0.01, \*\*\*P<0.001, n.s., not significant [P>0.05], student's t-test used in all analyses).

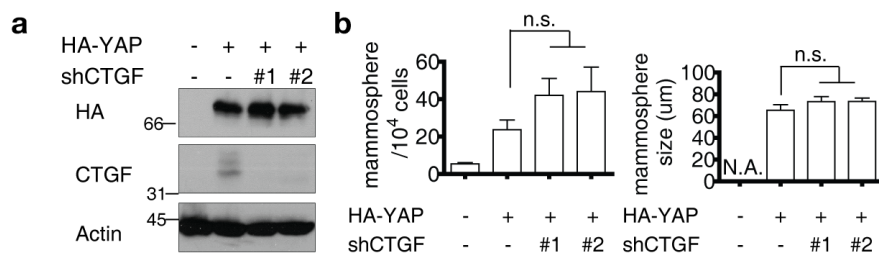

**Supplementary Figure 4. CTGF is dispensable for YAP induction of MaSC properties.** (a) Western blot analysis of MCF-10A cells transduced with the indicated viruses. (b) Number and sizes of mammospheres formed by cells generated in (a) (n=3 experiments for frequency, n>37 for size of mammospheres). Data are presented as means  $\pm$  s.e.m. (n.s., not significant, student's t-test used in all analyses).

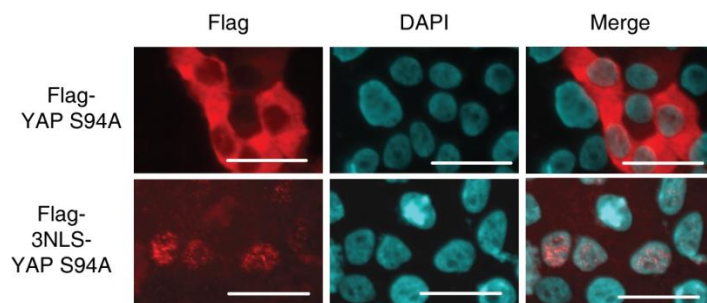

**Supplementary Figure 5. Localization of NLS-tagged YAP mutant protein.** MCF-10A cells expressing the indicated genes were analyzed by immunofluorescence using an anti-Flag antibody. Scale bar: 20μm.

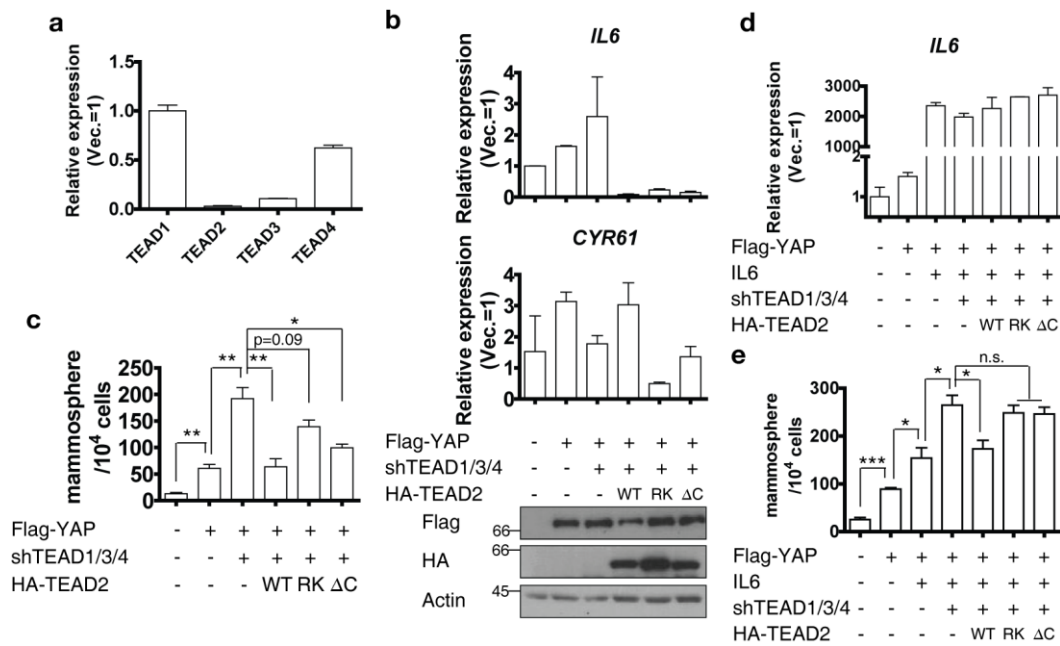

**Supplementary Figure 6. TEAD is dispensable for YAP induction of MaSC properties.** (a) MCF-10A cells were analyzed for TEAD expression by qPCR (n=2 replicates). (b,c) MCF-10A cells expressing YAP were infected with lentivirus expressing TEAD1/3/4 shRNA together with wild-type (WT), DNA-binding-deficient (R95K) or YAP-binding-deficient TEAD2 ( $\Delta$ C). (b) Western blotting and qRT-PCR (n=2 replicates). (c) Statistical analyses of the number of mammospheres formed by MCF-10A cells expressing the indicated viruses (n=3 experiments). (d,e) MCF-10A cells were infected with the indicated viruses. (d) qRT-PCR analysis of IL6 expression (n=2 replicates). (e) Statistical analyses of the number of mammospheres formed by MCF-10A cells expressing the indicated viruses (n=3 experiments). Data are presented as means  $\pm$  s.e.m. (\* $P$ <0.05, \*\* $P$ <0.01, \*\*\* $P$ <0.001; n.s., not significant [ $P$ >0.05], student's t-test used in all analyses).

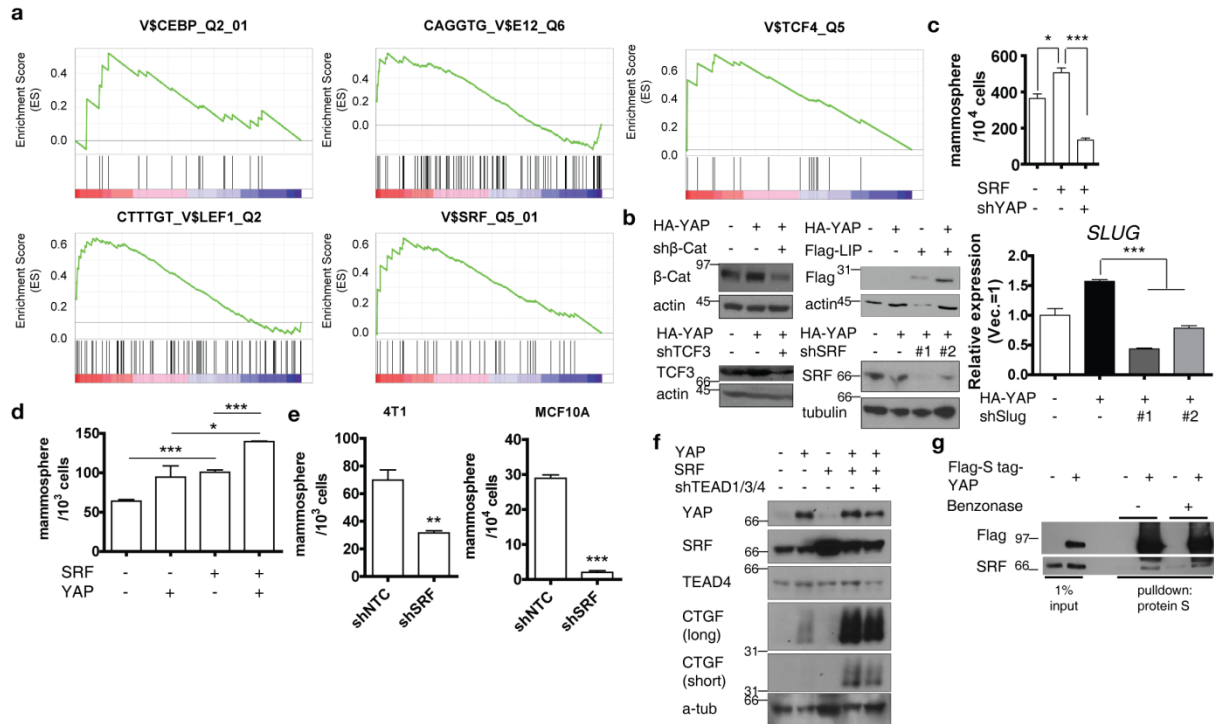

**Supplementary Figure 7. SRF and YAP induce MaSC-like properties.** (a) Representative graph of the GSEA analysis presented in Figure 3a. (b) Confirmation of successful inactivation of transcription factors in Figure 3b by Western blot and qRT-PCR analyses (n=2 replicates) of the indicated genes. (c,d) Statistical analyses of the number of mammospheres formed by 4T1 cells expressing the indicated viruses (n=3 experiments). (e) Mammosphere forming frequency for 4T1 and MCF-10A cells depleted of SRF. (f) Western blot analyses of MCF-10A cells expressing the indicated viruses. (g) Co-immunoprecipitation analysis of DSP crosslinked 293T cells expressing S-tagged YAP and pretreated with benzonase. Data are presented as means  $\pm$  s.e.m. (\*P<0.05, \*\*\*P<0.001, student's t-test used in all analyses).

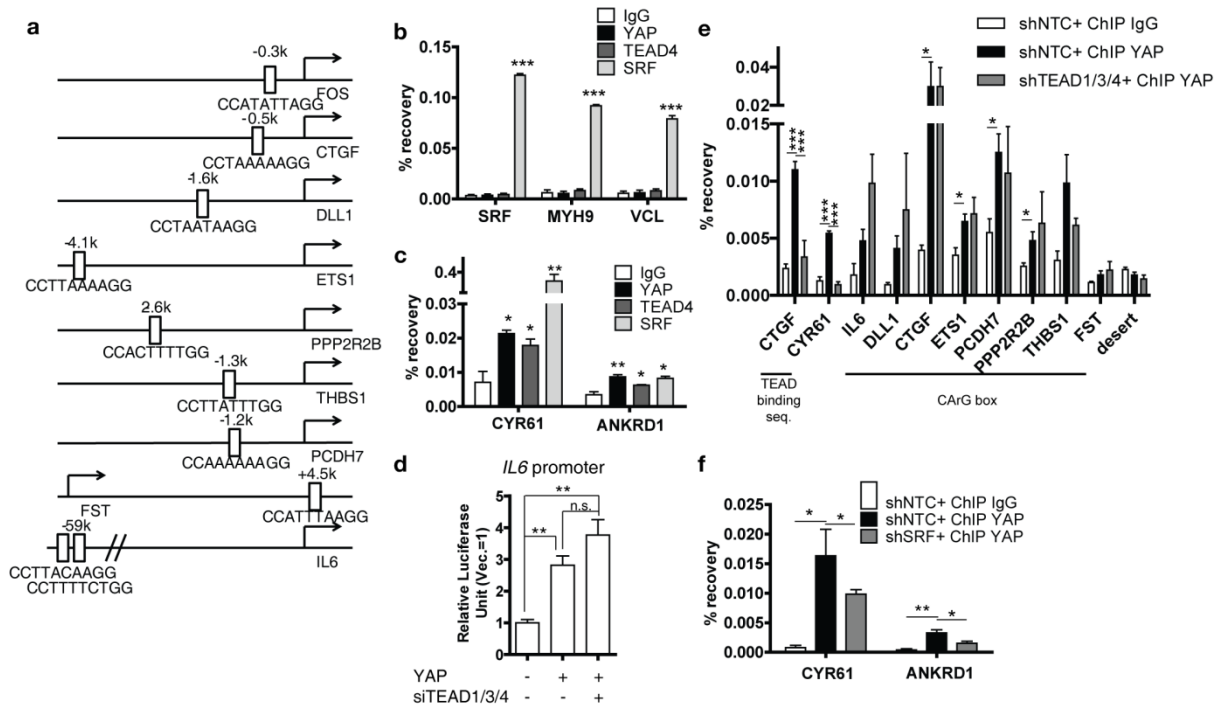

**Supplementary Figure 8. YAP interacts with SRF to induce MaSC-like properties.** (a) CArG boxes in the promoters of MaSC signature genes examined. (b) ChIP analyses of the indicated SRF-MRTF-dependent gene promoters with DNA used in Figure 4f (n=3 experiments). (c) ChIP analyses of the indicated YAP targets uninfluenced by SRF depletion with DNA used in Figure 4f (n=3 experiments). (d) Luciferase assays of the *IL6* promoter CArG box in 293T cells overexpressing the indicated genes (n=3 experiments). (e) ChIP analyses of the indicated MaSC signature genes (n=3 experiments). (f) ChIP analyses of YAP targets not influenced by SRF depletion with DNA used in Figure 4i (n=3 experiments). Data are presented as means  $\pm$  s.e.m. (\* $P$ <0.05, \*\* $P$ <0.01, \*\*\* $P$ <0.001, n.s., not significant [ $P$ >0.05], student's t-test used in all analyses).

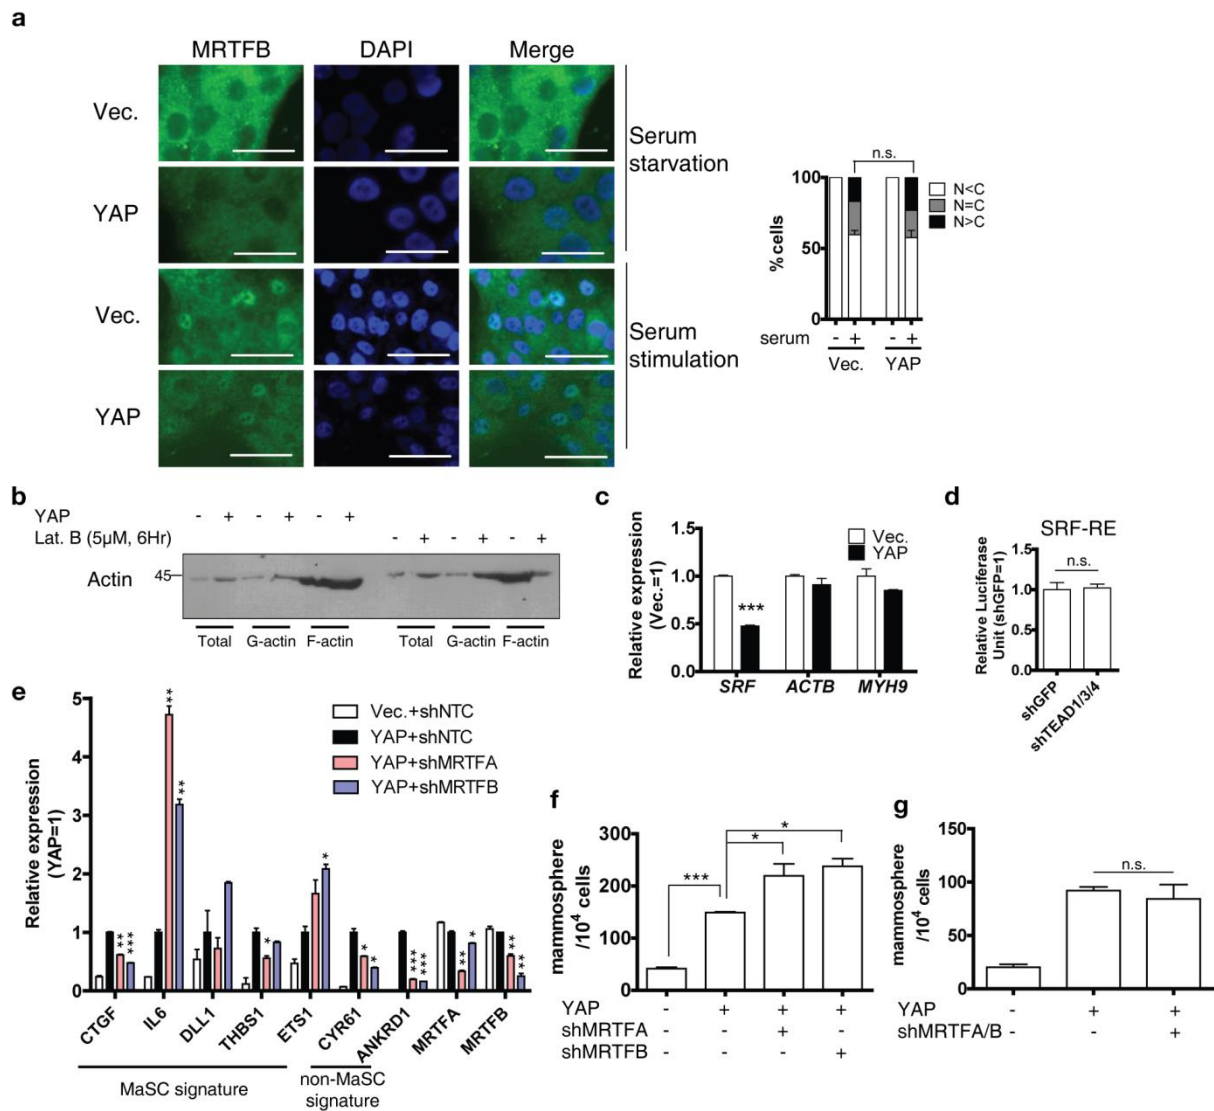

**Supplementary Figure 9. YAP does not influence SRF-MRTF activity.** (a) Control and Yap-overexpressing MCF-10A cells were either serum starved or stimulated and analyzed for MRTFB localization by immunofluorescence assay. Bar graph on the right shows quantification (n=3 experiments). Scale bar: 20µm. (b) F/G-actin fractionation assay of MCF-10A cells overexpressing YAP or treated with Latrunculin B. (c) qRT-PCR analyses of SRF-MRTF target genes in MCF-10A cells overexpressing YAP (n=2 replicates). (d) Luciferase assays of the SRF-MRTF-responsive SRF-RE promoter in 293T cells treated with the indicated shRNA (n=3 experiments). (e) qRT-PCR analyses of YAP target genes in MCF-10A cells infected with the indicated viruses (n=2 replicates). (f) Quantification of mammosphere assay and statistical analysis of cells generated in (e) (n=3 experiments). Data are presented as means  $\pm$  s.e.m. (\* $P$ <0.05, \*\* $P$ <0.01, \*\*\* $P$ <0.001, student's t-test used in all analyses).



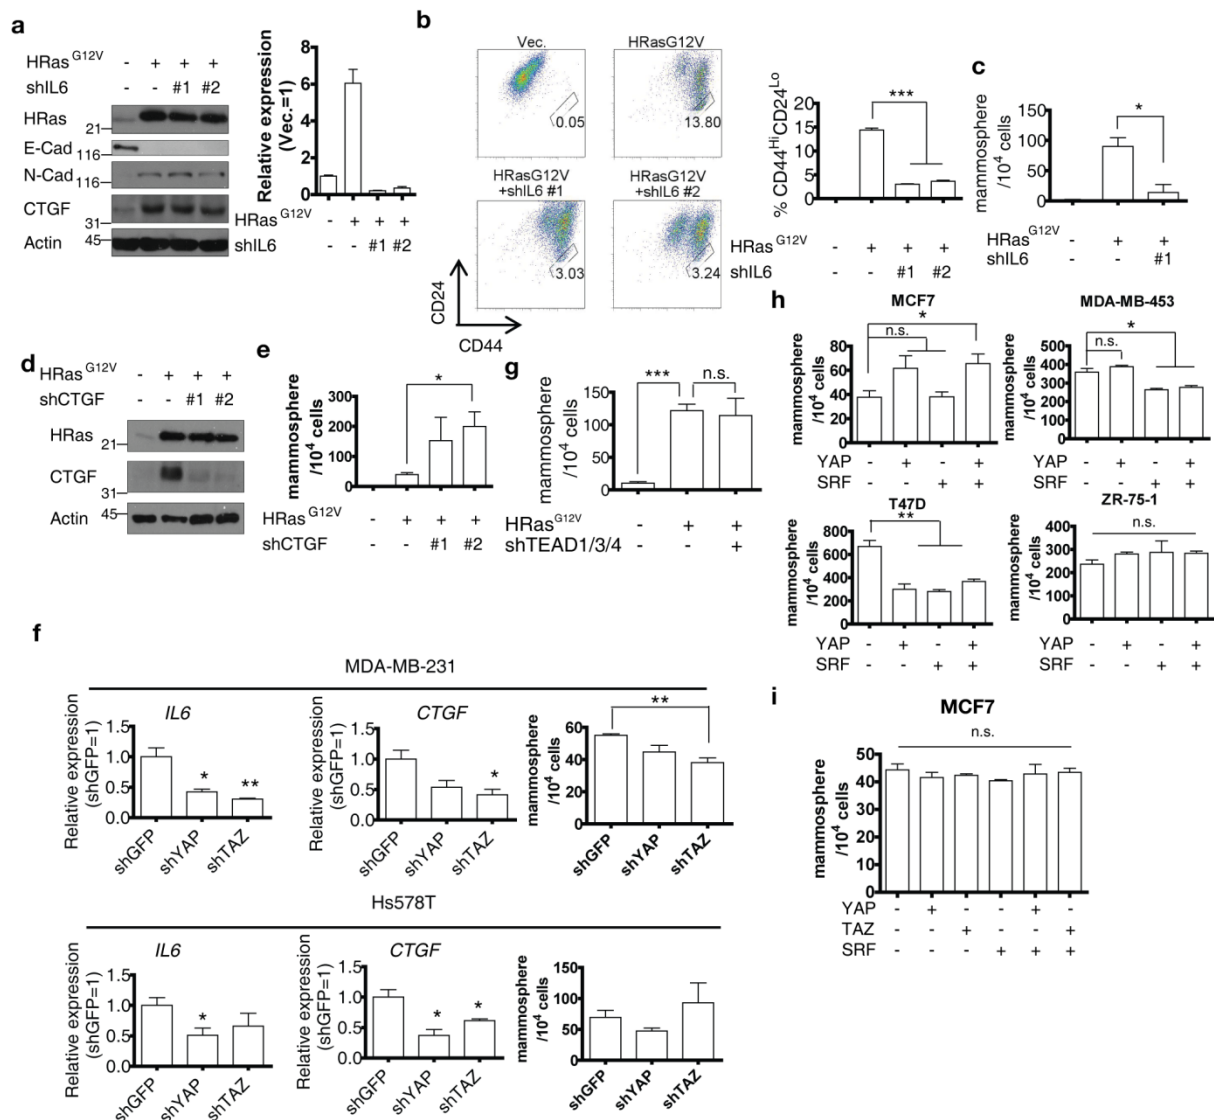

**Supplementary Figure 10. SRF-YAP promotes Ras-induced cancer stem cell formation through regulation of IL6.** (a-c) MCF-10A cells were transformed with H-Ras<sup>G12V</sup> and then infected with shRNA against IL6. (a) Western blot and qRT-PCR analyses of generated cells (n=2 replicates). (b) Representative FACS plot and corresponding statistical analysis (n=3 experiments), and (c) quantification of mammosphere assays performed using cells generated in (a) (n=3 experiments). (d, e) MCF-10A cells were transformed with H-Ras<sup>G12V</sup> and then infected with shRNA against CTGF. (d) Western blot analysis of generated cells. (e) Quantification of mammosphere assays performed using cells generated in (d) (n=3 experiments). (f) qRT-PCR and statistical analyses of mammosphere assays in cells depleted of YAP or TAZ. (g) Quantification of mammosphere assays performed using cells infected with virus expressing HRas<sup>G12V</sup> and shRNA against TEAD (n=3 experiments). (h) Quantification of mammosphere assays performed using luminal-type breast cancer cell lines overexpressing SRF and/or YAP (n=3 experiments). (i) Quantification of mammosphere assays performed using MCF7 cells overexpressing SRF and/or YAP/TAZ (n=3 experiments). Data are presented as means ±



s.e.m. (\*P<0.05, \*\*P<0.01, \*\*\*P<0.001; n.s., not significant [P>0.05] , student's t-test used in all analyses).

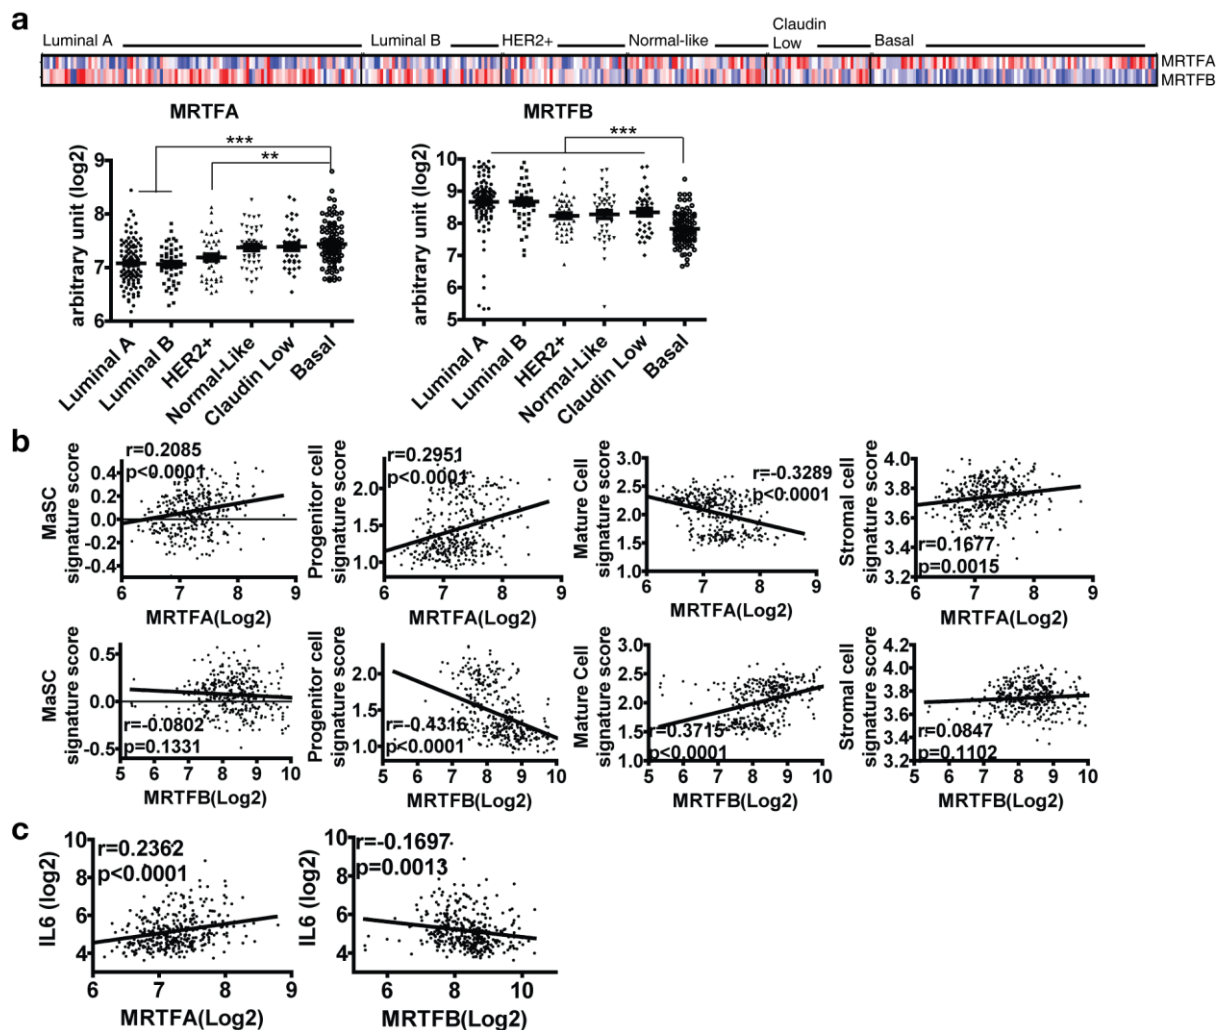

**Supplementary Figure 11. MRTF family gene expression in breast cancer.** (a) Heatmap and statistical analyses of MRTFA and MRTFB expression in a panel of breast cancers (GSE31448; n>27for each subtype) (b) Scatter plot of signature scores for the indicated cell types against MRTFA or MRTFB expression levels (n=357; correlation tested using Pearson's correlation coefficient, r). (c) Scatter plot of IL6 and CTGF expression against MRTFA or MRTFB expression levels (n=357; correlation tested using Pearson's correlation coefficient, r). Data are presented as means  $\pm$  s.e.m. (\*\*P<0.01, \*\*\*P<0.001).

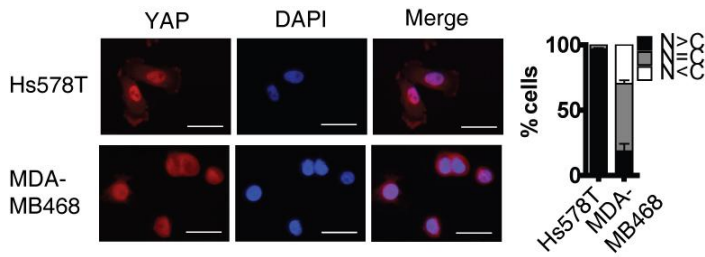

**Supplementary Figure 12. Immunofluorescence analysis and statistical quantification of YAP expression in the indicated cell lines. Scale bar: 20 $\mu$ m.**

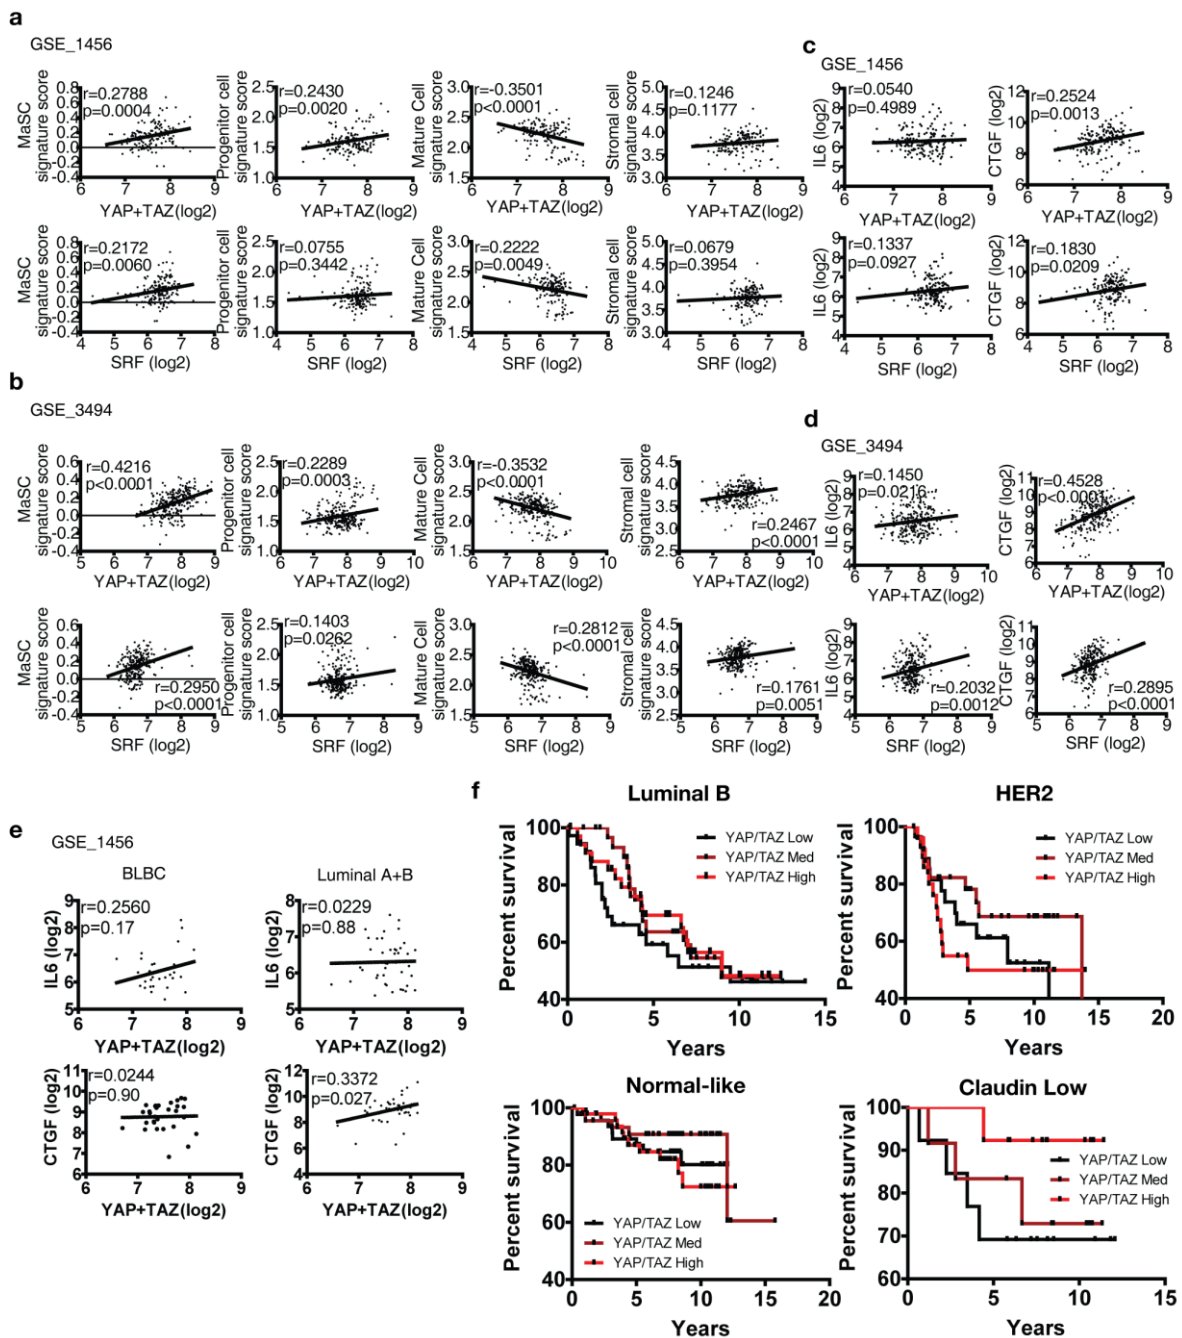

**Supplementary Figure 13. YAP/TAZ and SRF are upregulated in basal-type breast cancer and their expression is correlated with a stem/progenitor cell signature and IL6 and CTGF expression levels. (a,b)**

Analyses of the two independent breast cancer cohorts, GSE1456 (n=159) and GSE3494 (n=251); the approach was similar to that described in Fig. 6e (correlation tested using Pearson's correlation coefficient, r). (c,d) Analysis of the two independent breast cancer cohorts, GSE1456 (n=159) and GSE3494 (n=251); the approach was similar to that used in Fig. 6f (correlation tested using Pearson's correlation coefficient, r). (e) Correlation between YAP/TAZ and IL6 expression in BLBC and luminal-type breast cancer (n>29 for each subtype; correlation tested using Pearson's correlation coefficient, r). (f) Kaplan–Meier curves for other types of breast cancer not listed in Fig. 7g with different levels of YAP/TAZ expression. No subtypes showed a significant correlation (n>38 for each subtype; log-rank test).

Fig. 1a

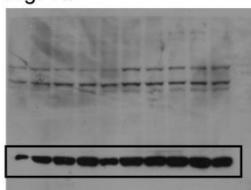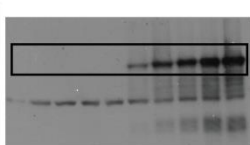

Fig. 1e

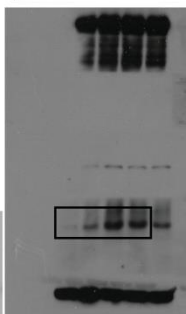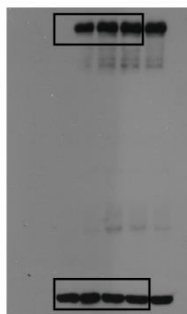

Fig. 4d

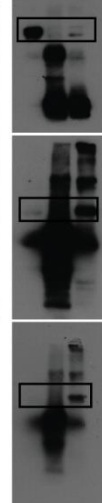

Fig. 6d

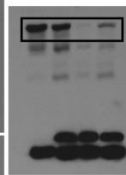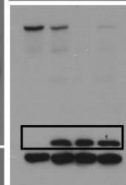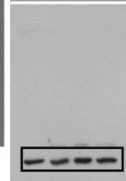

Fig. 2a

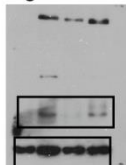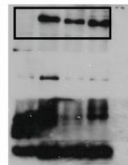

Fig. 2d

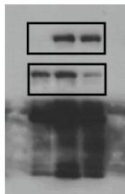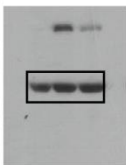

Fig. 4e

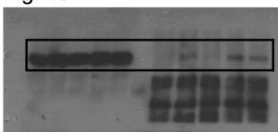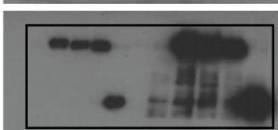

Fig. 4a

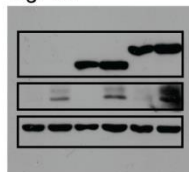

Fig. 4b

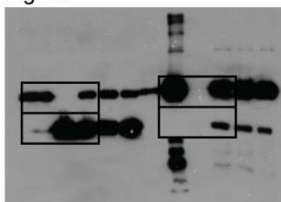

Fig. 4c

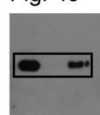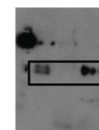

Fig. 5c

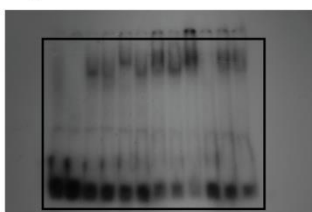

Fig. 4f

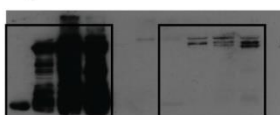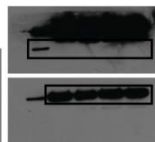

Fig. 9a

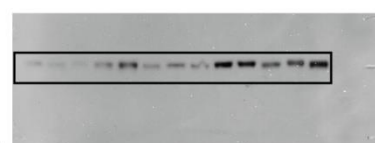

Fig. 6a

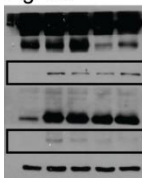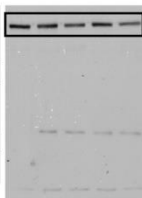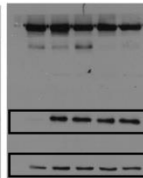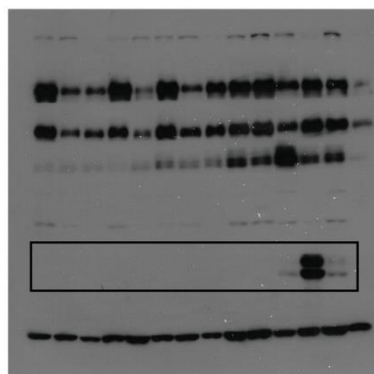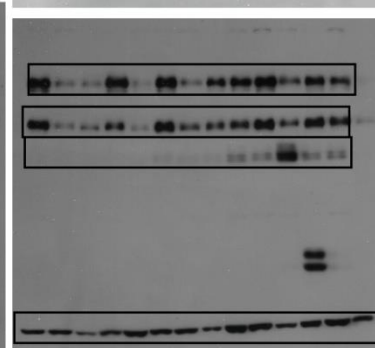

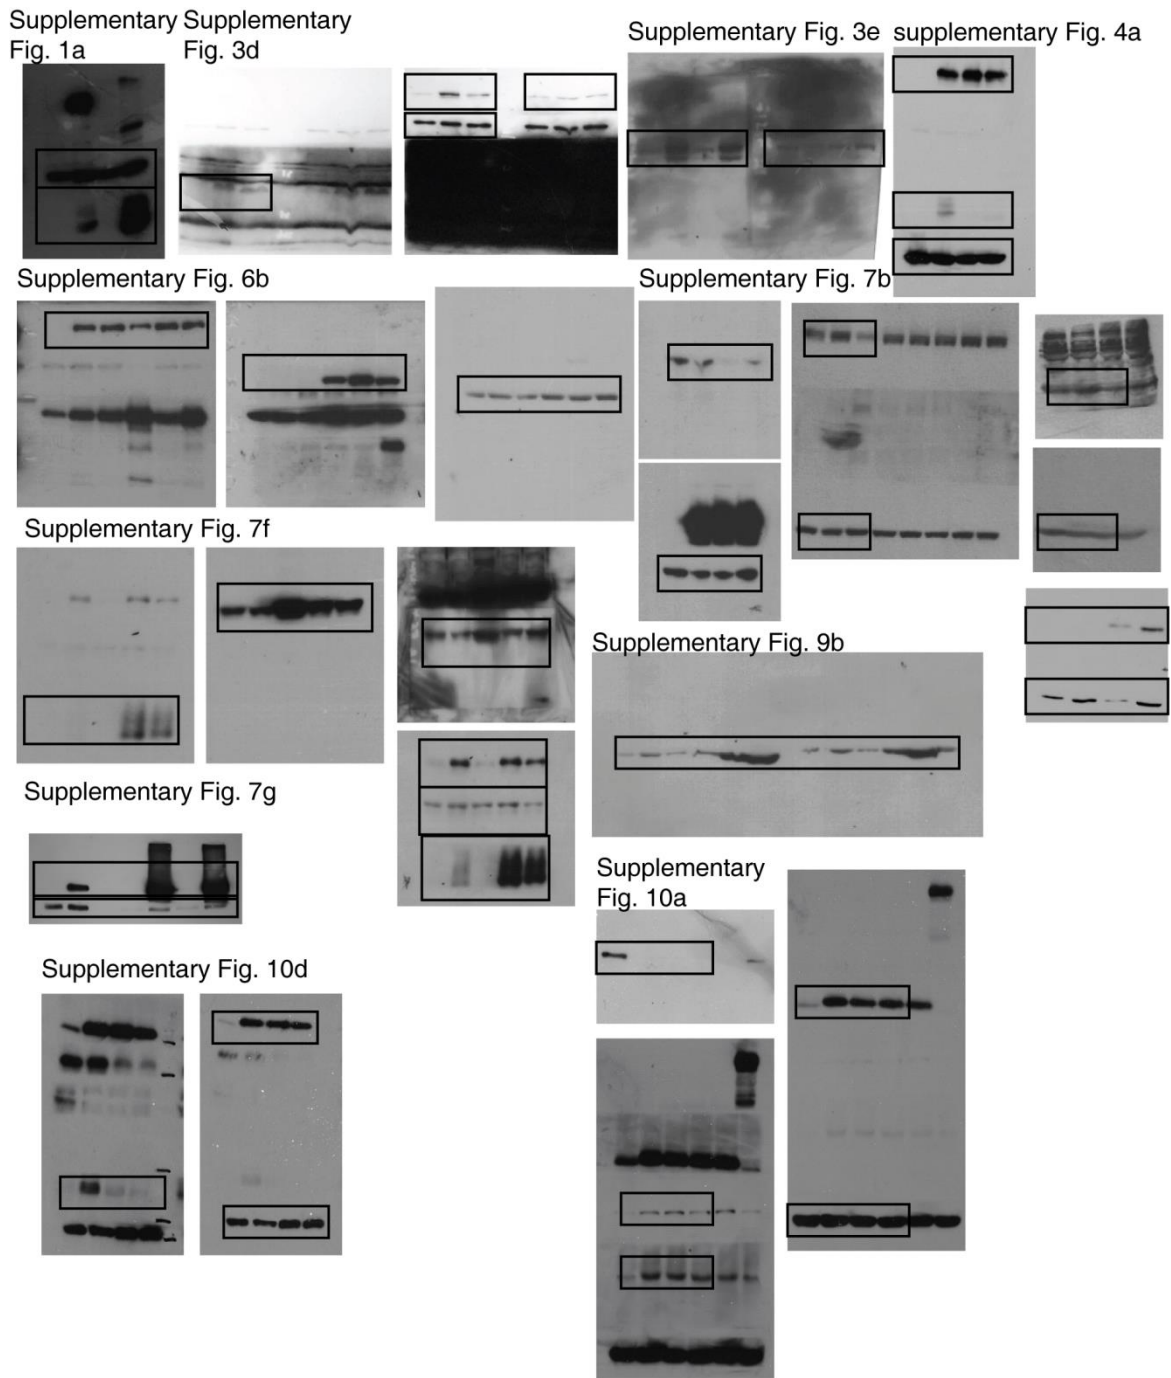

**Supplementary Figure 14. Original, uncropped image of blots in main and Supplementary Figures.**

**Supplementary Table 1. List of primers used for qRT-PCR and ChIP-qPCR**

## RT-qPCR primers

Human genes

|        |         |                          |
|--------|---------|--------------------------|
| IL6    | Forward | AAATTCGGTACATCCTCGACGG   |
|        | Reverse | AGG TTCAGGTTGTTTTCTGC    |
| HPRT1  | Forward | CCTGGCGTCGTGATTAGTGAT    |
|        | Reverse | AGACG TTCAGTCCTGTCCATAA  |
| TEAD1  | Forward | ATGGAAAGGATGAGTGA CTCTGC |
|        | Reverse | TCCCACATGGTGGATAGATAGC   |
| TEAD2  | Forward | GCCTCCGAGAGCTATATGATCG   |
|        | Reverse | TCACTCCGTAGAAGCCACCA     |
| TEAD3  | Forward | TCATCCTGTCAGACGAGGG      |
|        | Reverse | TCTTCCGAGCTAGAACCTGTATG  |
| TEAD4  | Forward | GAACGGGGACCCTCCAATG      |
|        | Reverse | GCGAGCATACTCTGTCTCAAC    |
| ETS1   | Forward | ACCGTGCTGACCTCAATAAGG    |
|        | Reverse | CCCCGCTGTCTTGTGGATG      |
| DLL1   | Forward | TCCTGATGACCTCGCAACAGA    |
|        | Reverse | ACACACGAAGCGGTAGGAGT     |
| ANKRD1 | Forward | AGTAGAGGAACTGGTCACTGG    |
|        | Reverse | TGGGCTAGAAGTGTCTTCAGAT   |
| CTGF   | Forward | ACCGACTGGAAGACACGTTTG    |
|        | Reverse | CCAGGTCAGCTTCGCAAGG      |
| THBS1  | Forward | CCTGACCGTCCAAGGAAAGC     |
|        | Reverse | CCTTTGCGATGCGGAGTCT      |
| SGK1   | Forward | AGGATGGGTCTGAACGACTTT    |
|        | Reverse | GCCCTTTCCGATCACTTTCAAG   |

|       |         |                        |
|-------|---------|------------------------|
| EDN1  | Forward | TGTGTCTACTTCTGCCACCT   |
|       | Reverse | CCCTGAGTTCTTTTCCTGCTT  |
| ITGB2 | Forward | AGTGTGACACCATCAACTGTG  |
|       | Reverse | GCACTCGCATACGTTGCAG    |
| CDH1  | Forward | ATTTTTCCCTCGACACCCGAT  |
|       | Reverse | TCCCAGGCGTAGACCAAGA    |
| CDH2  | Forward | TGCGGTACAGTGTAACTGGG   |
|       | Reverse | GAAACCGGGCTATCTGCTCG   |
| VIM   | Forward | AGTCCACTGAGTACCGGAGAC  |
|       | Reverse | CATTTACGCATCTGGCGTTC   |
| FN1   | Forward | AGGAAGCCGAGGTTTTAACTG  |
|       | Reverse | AGGACGCTCATAAGTGTACC   |
| NEDD9 | Forward | ATGGCAAGGGCCTTATATGACA |
|       | Reverse | TTCTGCTCTATGACGGTCAGG  |
| SLUG  | Forward | TGTGACAAGGAATATGTGAGCC |
|       | Reverse | TGAGCCCTCAGATTTGACCTG  |
| SRF   | Forward | CCGGCAAGGCACTGATTCA    |
|       | Reverse | CTCATTCTCTGGTCTGTTGTGG |
| ACTB  | Forward | CATGTACGTTGCTATCCAGGC  |
|       | Reverse | CTCCTTAATGTCACGCACGAT  |
| MYH9  | Forward | CCGCCAAGCCAAGGAAGAA    |
|       | Reverse | GGTATTTGTTGTACGGCTCCA  |

#### Mouse genes

|       |         |                         |
|-------|---------|-------------------------|
| Il6   | Forward | TAGTCCTTCTACCCCAATTTCC  |
|       | Reverse | TTGGTCCTTAGCCACTCCTTC   |
| Gapdh | Forward | AGGTCGGTGTGAACGGATTTG   |
|       | Reverse | TGTAGACCATGTAGTTGAGGTCA |

#### ChIP-qPCR primers

Human genomic loci



|                               |         |                            |
|-------------------------------|---------|----------------------------|
| IL6                           | Forward | CTGCAAGTCCCACAGTTCA        |
|                               | Reverse | CCCACCTTCTTCAAATCCA        |
| PCDH7                         | Forward | CGCAACCATCCAAAGTCTG        |
|                               | Reverse | CCCAGAAAGCCACTCTGTTC       |
| FST                           | Forward | TAAAGCACTCCGGATCTTGC       |
|                               | Reverse | TGCGTGCTTTGTAAGTGTCC       |
| PPP2R2B                       | Forward | ATGTGGAGGCAGAAAACACC       |
|                               | Reverse | ATGGGAGTAGGCTGCAGAGA       |
| ETS1                          | Forward | ATTCTCACCTAGACACTGTGC      |
|                               | Reverse | CCGAACCTCAGTTCCTCCAT       |
| DLL1                          | Forward | TGCCTAGGAGGGCAATTTAG       |
|                               | Reverse | CCCCAACCCACAACCTTTAC       |
| CTGF (TEAD binding sequence)  | Forward | GGAGTGGTGCGAAGAGGATA       |
|                               | Reverse | GCCAATGAGCTGAATGGAGT       |
| THBS1                         | Forward | AACTCCACGCAAGAAAAG         |
|                               | Reverse | GGCCAGGGCATAGGTAGAAG       |
| CYR61 (TEAD binding sequence) | Forward | TTCCAAGCGGTAAAGCATTG       |
|                               | Reverse | TCCCAAAGTGCTGGGATTAC       |
| CTGF (CArG box)               | Forward | TTCTGCTGTTTGCCTCTTC        |
|                               | Reverse | TATCCTCTTCGCACCACTCC       |
| CYR61 (CArG box)              | Forward | CAAGAATGCTTTGTGGTTGG       |
|                               | Reverse | GGTGAATCAGACACCAGACG       |
| ANKRD1 (CArG box)             | Forward | GGCACTTTTCTATGCAGTTGG      |
|                               | Reverse | TTCTGGCAGCATATTTTCAGC      |
| SRF                           | Forward | TATGCAAATAAGCGCCCTCT       |
|                               | Reverse | CCCCCATATAAAGAGATAACAATGTT |
| MYH9                          | Forward | CTCAAGACGCTCACAATGGA       |
|                               | Reverse | CTCATGTCATCCCACCACAA       |
| VCL                           | Forward | CCCGCTGAGGTGATTCTG         |
|                               | Reverse | GATTCCCGAGCCCTAACG         |
| Gene Desert                   | Forward | GTTTCATCCAGCACCTGTCT       |

|  |         |                      |
|--|---------|----------------------|
|  | Reverse | GTGATGGACCTGGAGCCTAA |
|--|---------|----------------------|

Mouse genomic loci

|             |         |                         |
|-------------|---------|-------------------------|
| Il6         | Forward | ATGAGGGTGTTCCTCCACAC    |
|             | Reverse | CCTTGT CAGGCATCAATGG    |
| Dil1        | Forward | GGCCCTCCAATAAACTCAT     |
|             | Reverse | CCCCAACACATAACCTTTA     |
| Ets1        | Forward | CTTTCTGGCTGGTAGGCAAG    |
|             | Reverse | TGAGAGCTGCCCTTTGTTTC    |
| Thbs1       | Forward | CTGGGTGTTTCCAAGGTTTG    |
|             | Reverse | CAGGGATCCAGGTAAGCA      |
| Gene desert | Forward | CATCAAGGTGCTGGACAAGA    |
|             | Reverse | AAAACCTTTGCTCCTGCTGCTGA |

### Supplementary Reference

1. Dupont, S. et al. Role of YAP/TAZ in mechanotransduction. *Nature* 474, 179-183 (2011).
